# Supplementary material for: Conserved host genes act as anchors for fast-evolving piRNA clusters via promoter hijacking
Source: Research Square preprint supplement (doi:10.21203/rs.3.rs-9860925/v1), 2026-06-05
Supplement: Supplementary file 1 [file b63c170cda430616e1ed78bc.pdf]

ENSG00000151131

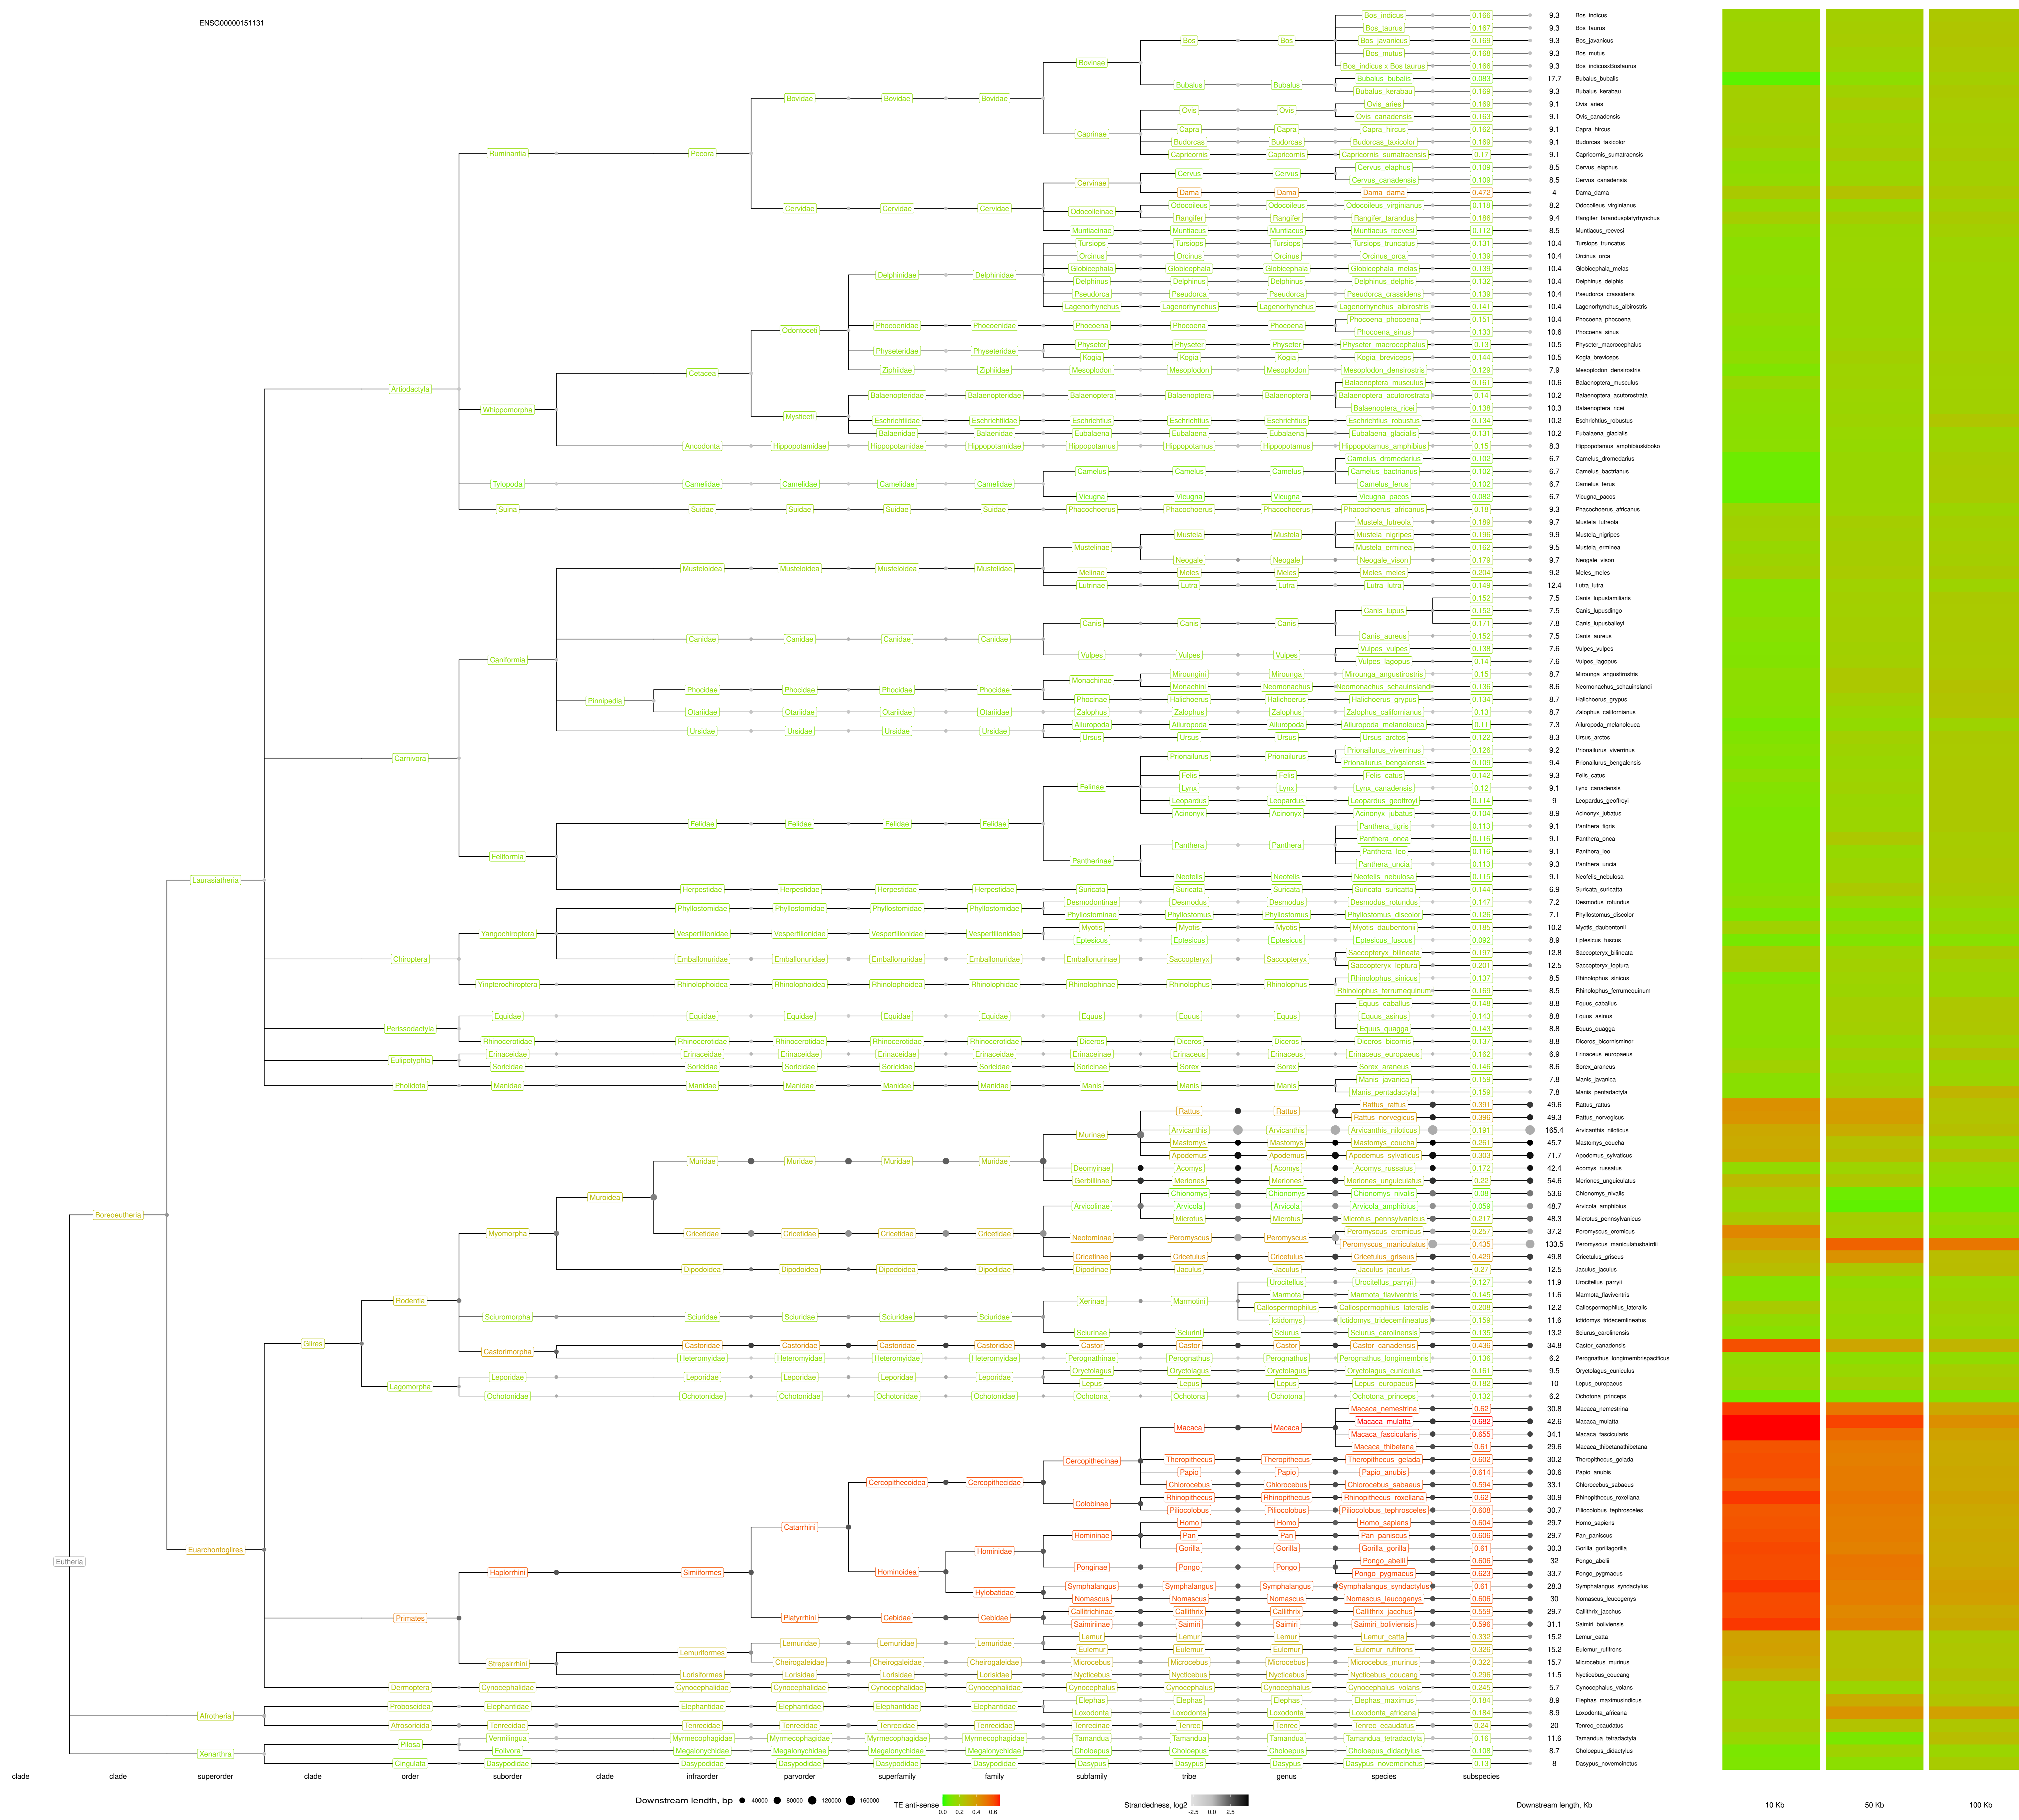

Figure S1. Evolutionary landscape of the NCPCHAPI-associated piRNA cluster. Phylogenetic tree showing the conservation and divergence of the intergenic region downstream of NCPCHAPI. Overlays denote the downstream intergenic length (size of the circles), total Mobile Genetic Element (MGE) content (integrated by strandedness (anti-sense to sense ratio, grey-scale color), and the fraction of antisense MGEs within the downstream length and the first 10 Kb, 50 Kb, 100 Kb of the locus (green-red scale).

ENSG00000170500

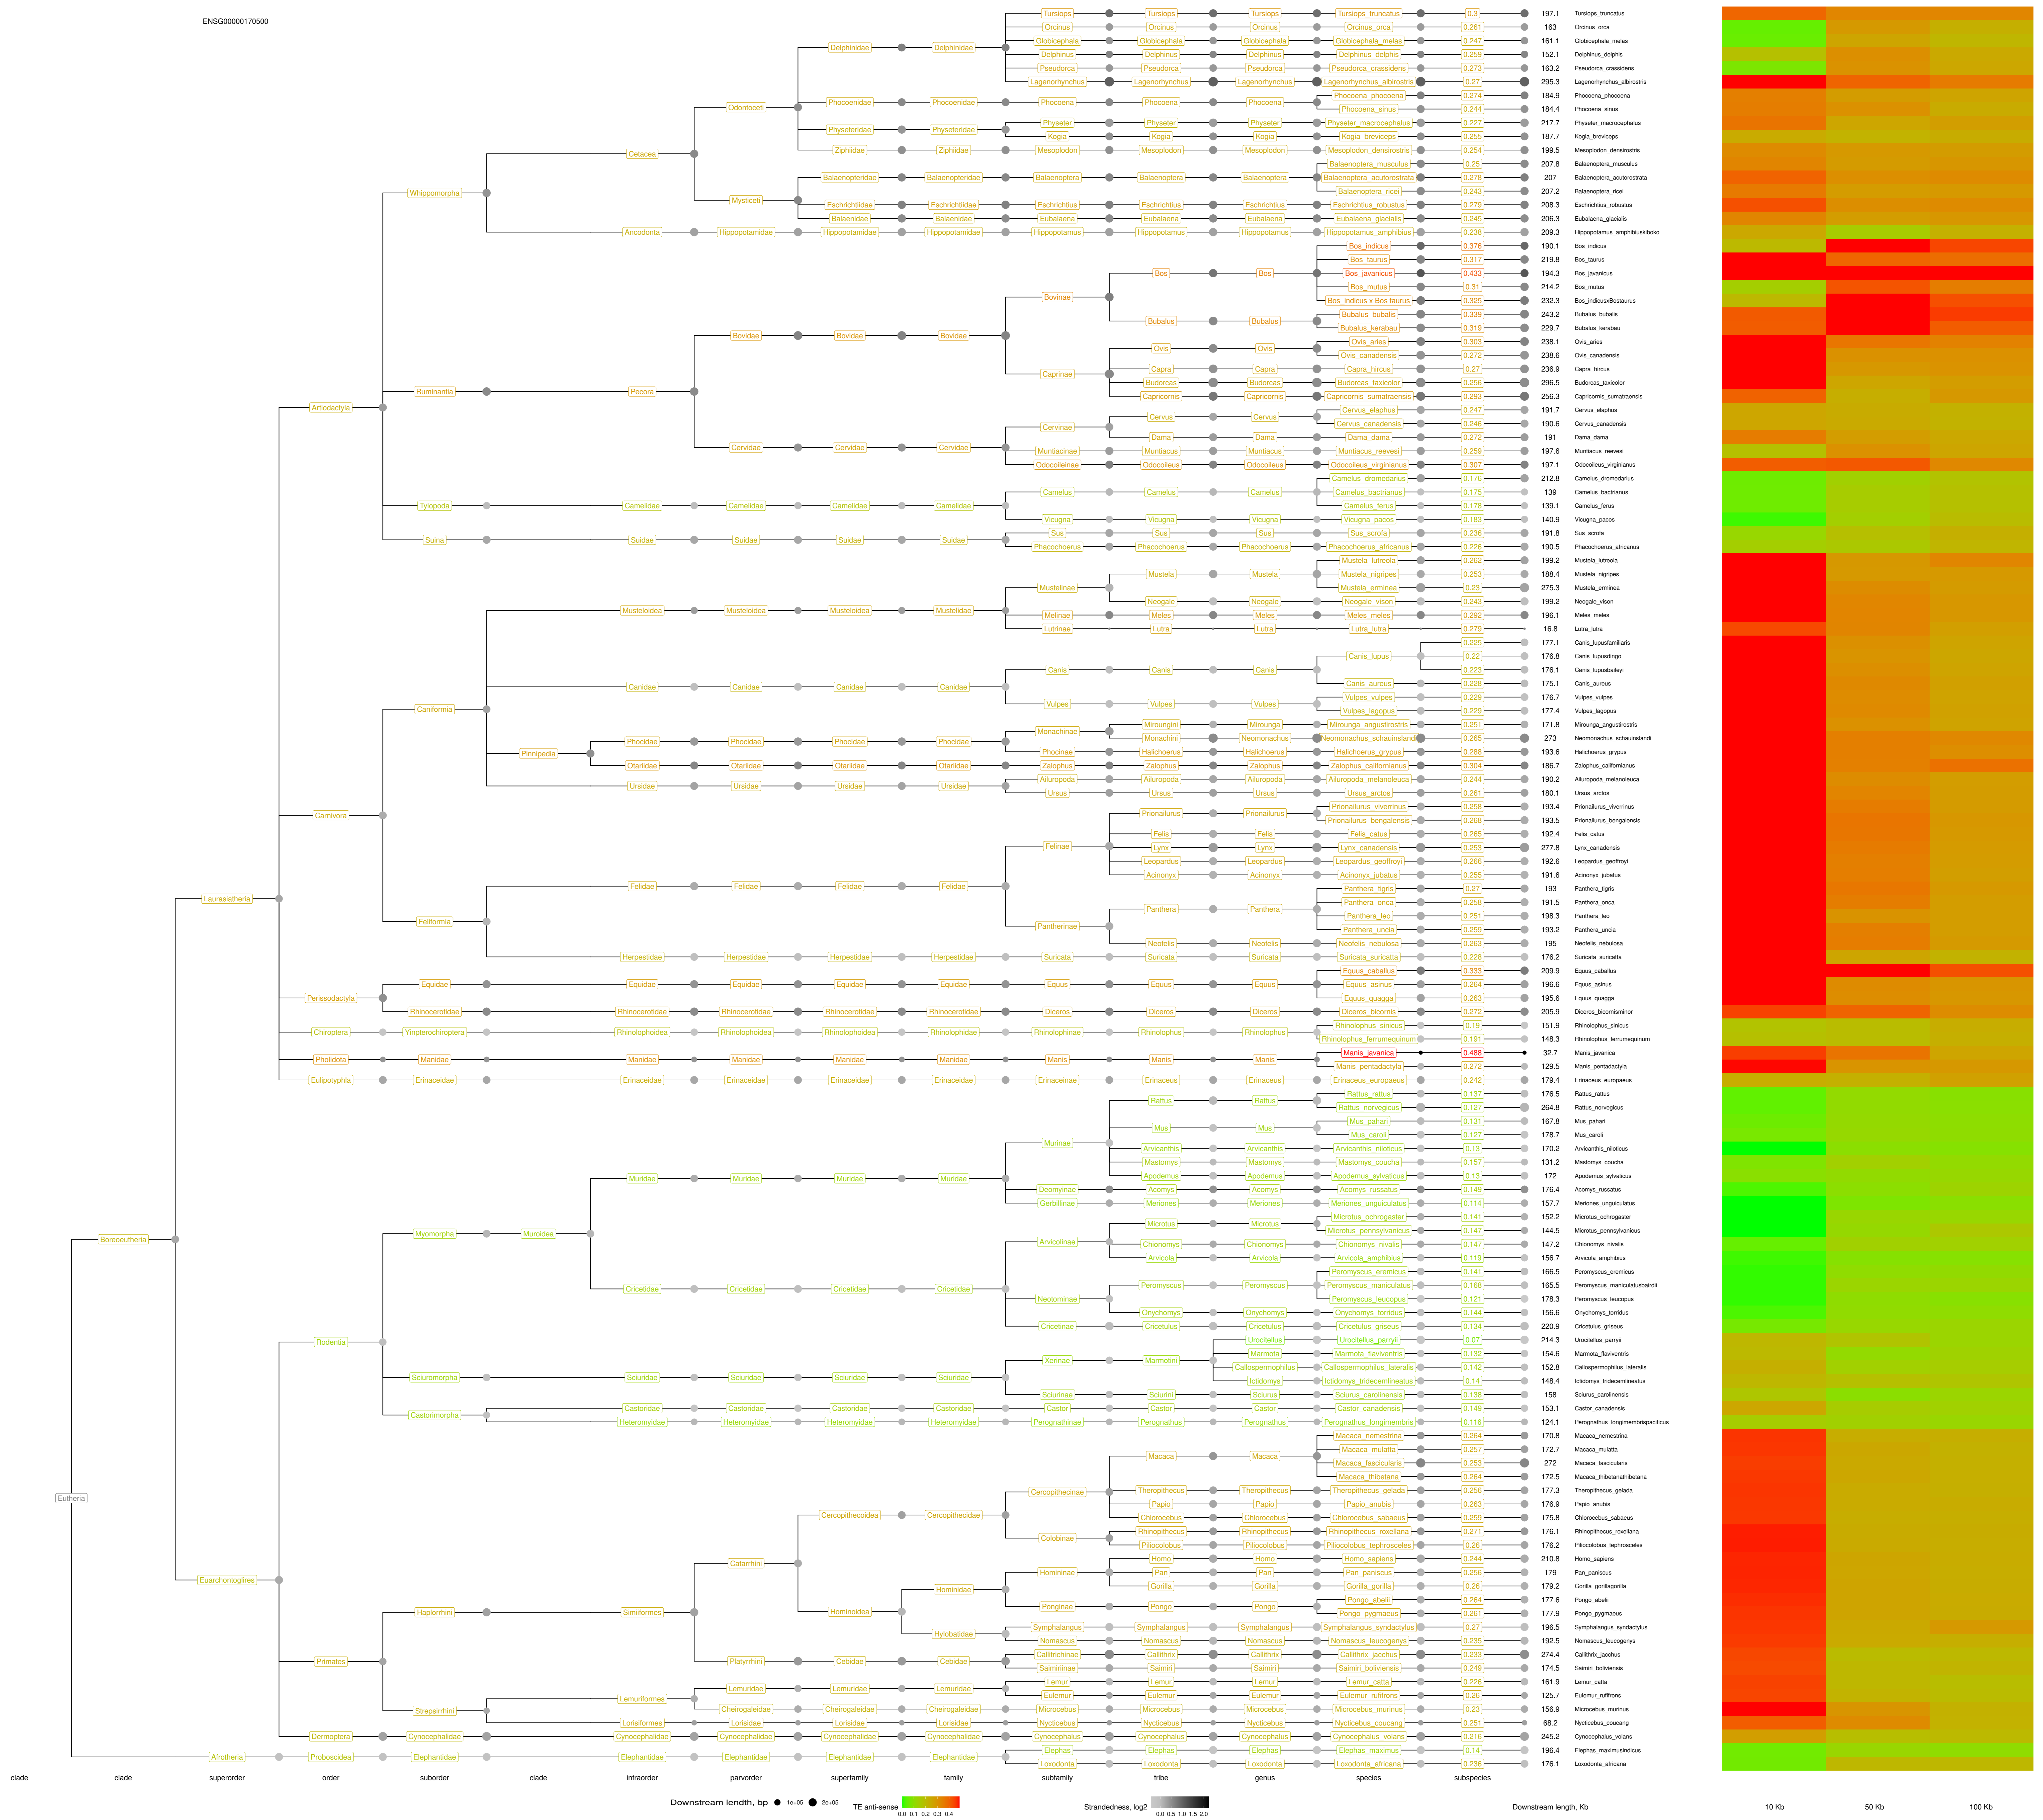

Figure S2: Evolutionary landscape of the LONRF2-associated piRNA cluster. Phylogenetic tree showing the conservation and divergence of the intergenic region downstream of LONRF2. Overlaps denote the downstream intergenic length (size of the circle), total Mobile Genetic Element (MGE) content categorized by strandness (left-to-right ratio, grayscale color), and the fraction of antisense MGEs within the downstream length and the first 10 Kb, 50 Kb, 100 Kb of the locus (green-red scale).

ENS00000091651

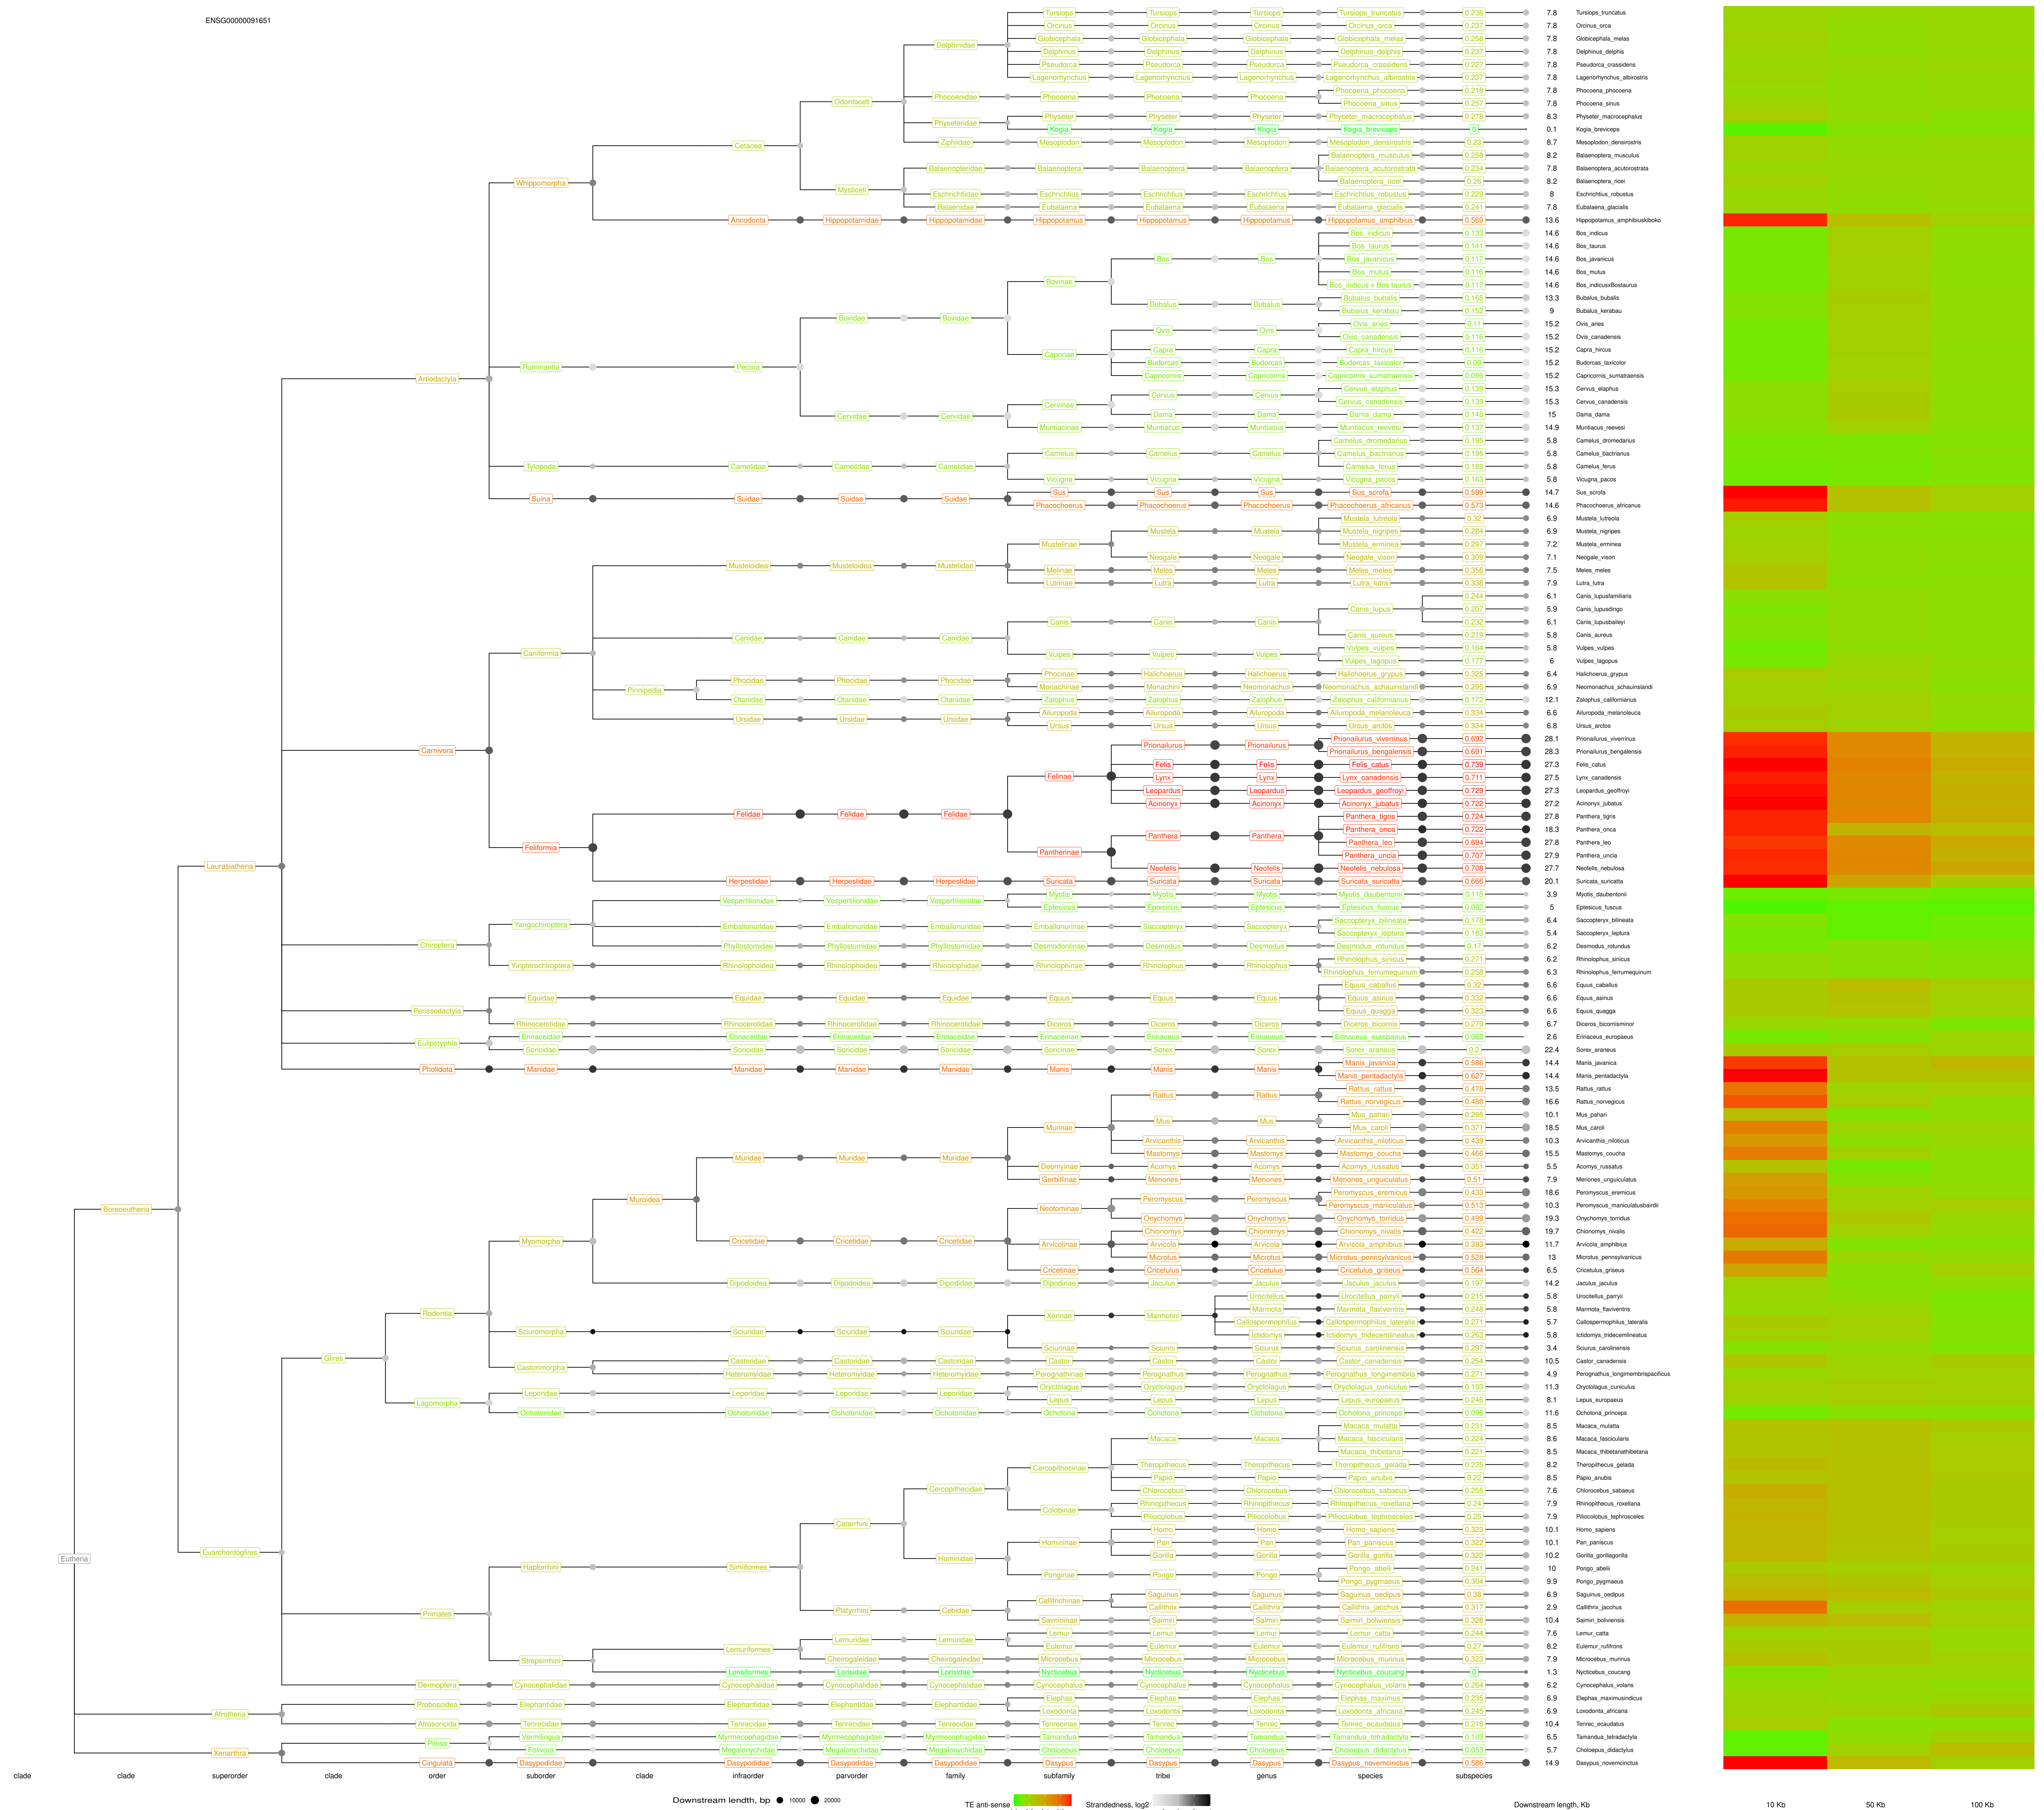

Figure S1: Evolutionary backdrop of the ORC-associated piRNA cluster. Phylogenetic tree showing the conservation and divergence of the intergenic region downstream of ORC. Overlaps show the downstream intergenic length (size of the circle), total Mobile Genetic Element (MGE) content categorized by strandness (left-to-right axis, green-to-red), and the fraction of antisense MGEs within the downstream length and the first 10 Kb, 50 Kb, 100 Kb of the locus (green-to-red axis).

ENS00000112167

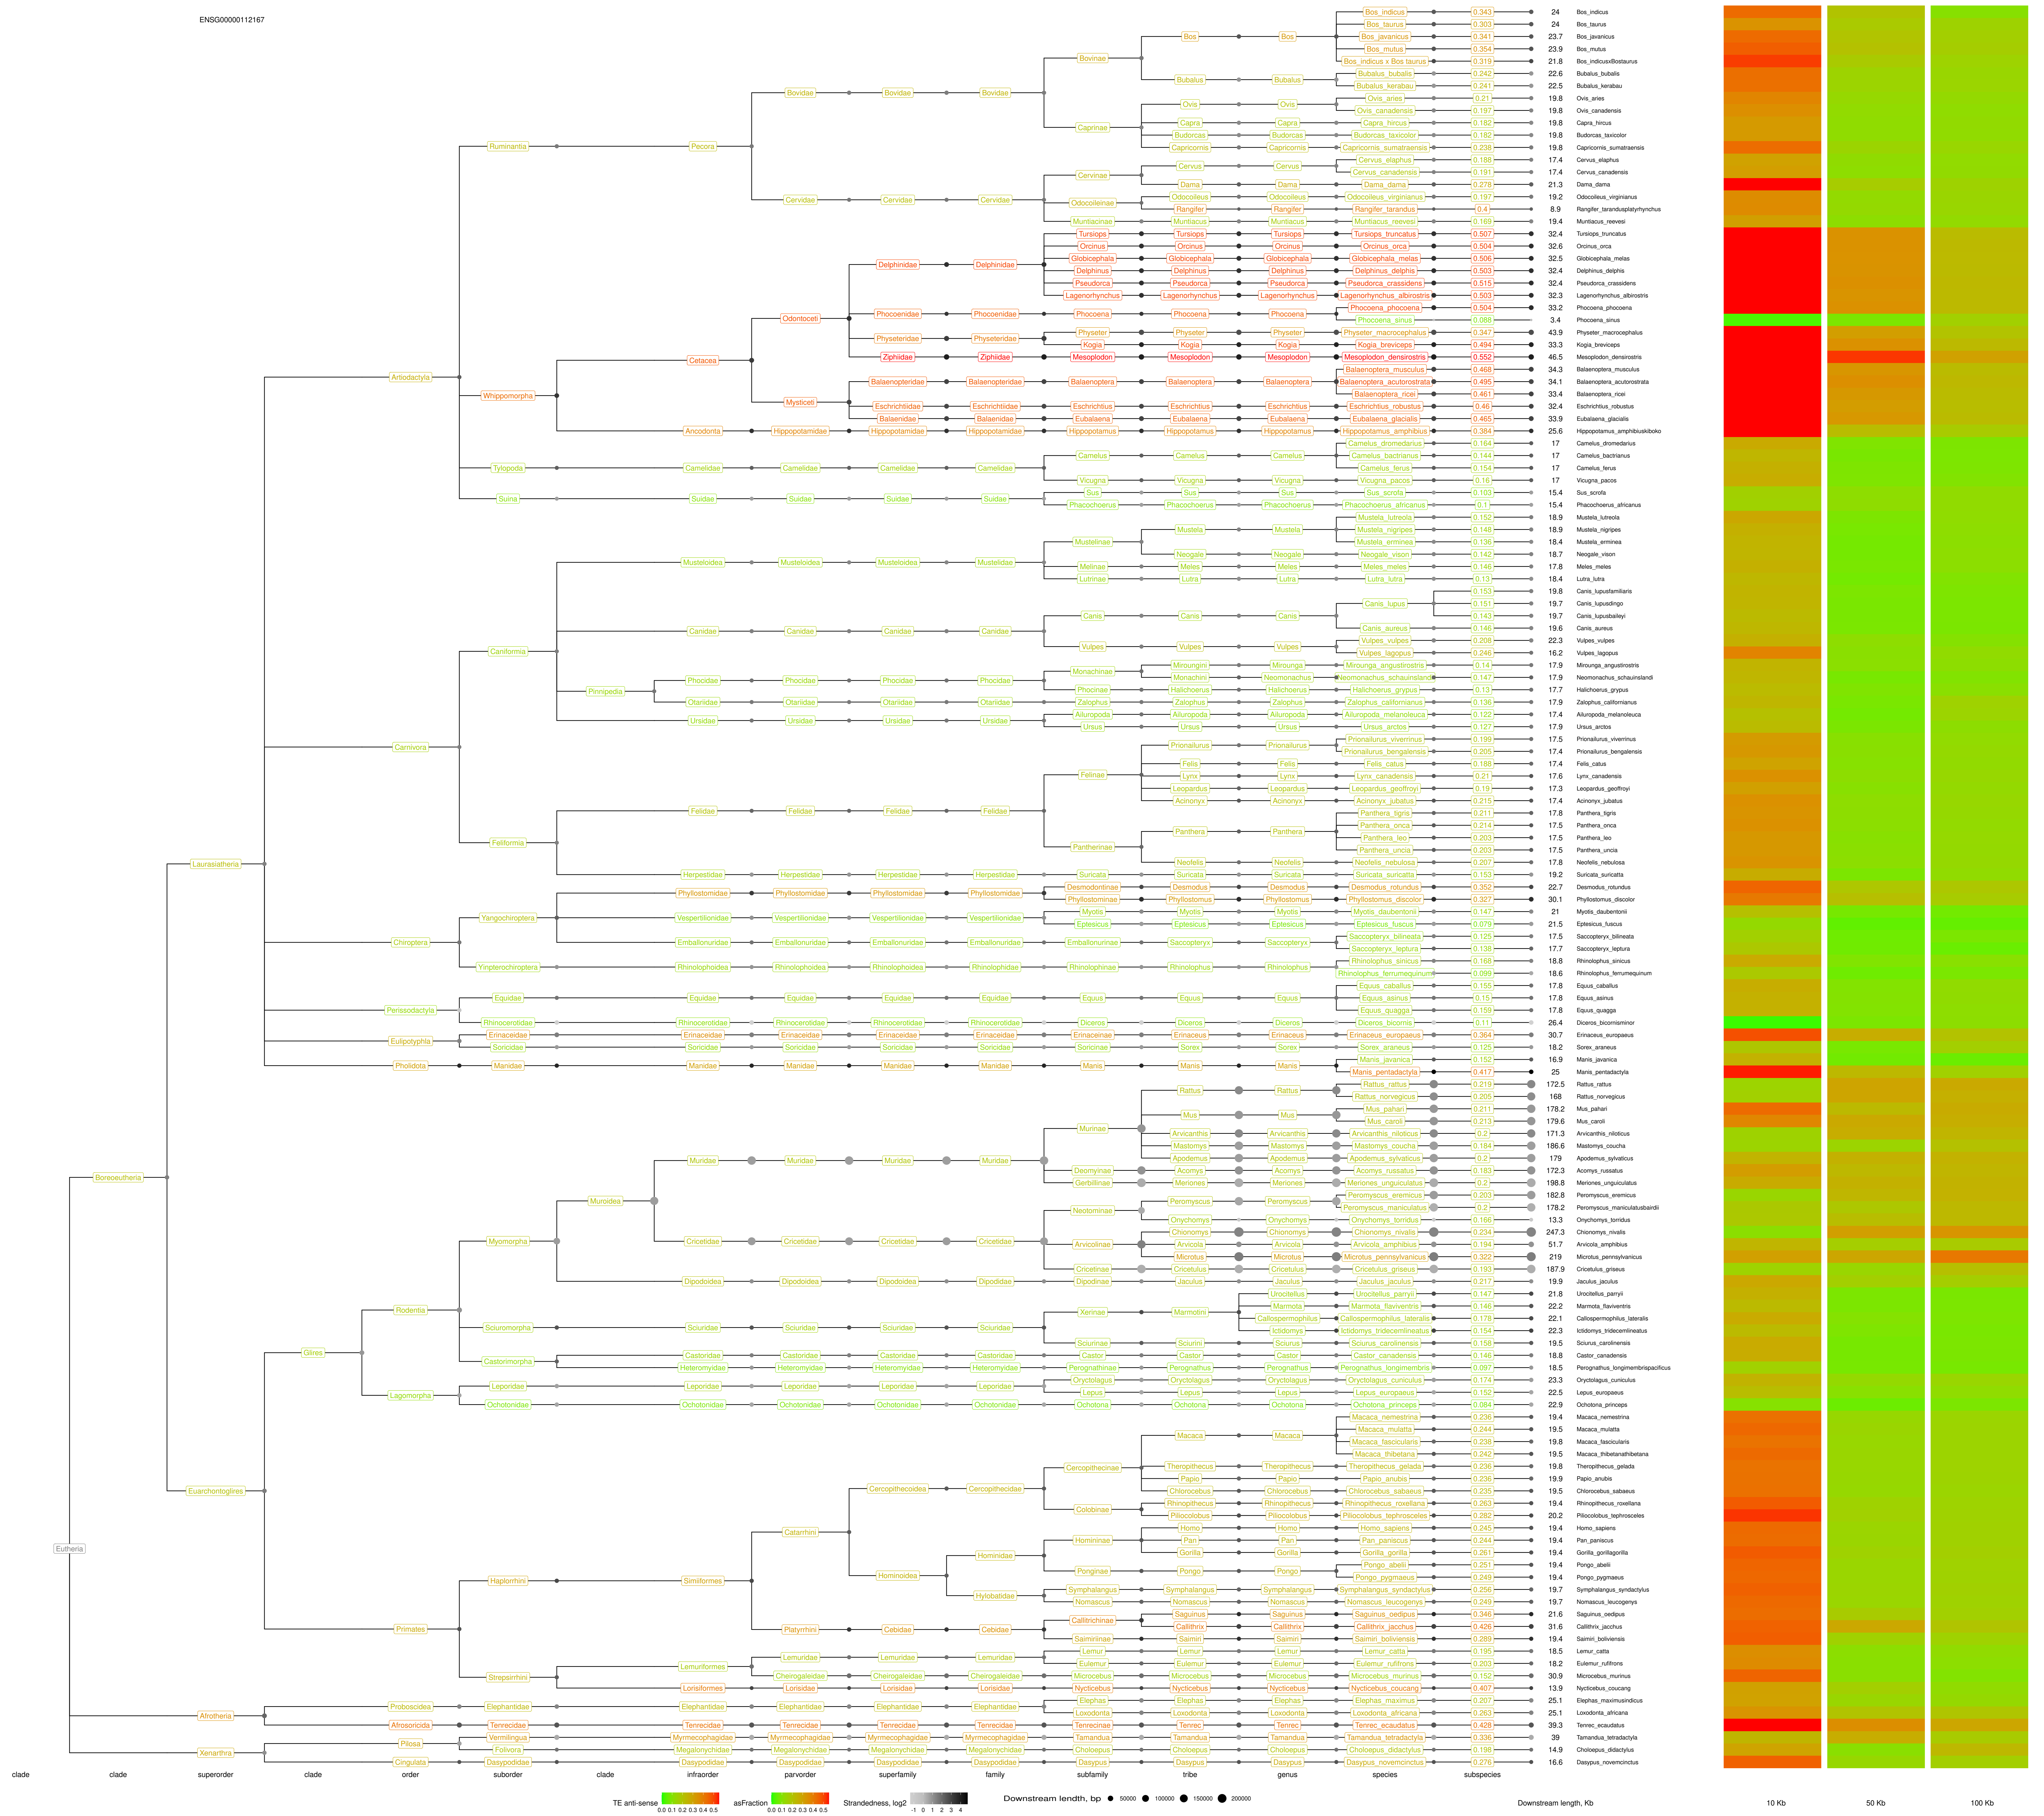

Figure S1: Evolutionary landscape of the SAYS2-associated piRNA cluster. Phylogenetic tree showing the conservation and divergence of the intragenic region downstream of SAYS2. Overlays denote the downstream intragenic length (size of the circles), total Mobile Genetic Element (MGE) content categorized by strandedness (anti-sense to sense ratio, grayscale color), and the fraction of antisense MGEs within the downstream length and the first 10 Kb, 50 Kb, 100 Kb of the locus (green-red scale).
